# Supplementary material for: Targeting HER2 with Trastuzumab Deruxtecan: A Dose-Expansion, Phase I Study in Multiple Advanced Solid Tumors
Source: Oxford University Press journal article supplement (doi:10.1158/2159-8290.cd-19-1014), 2020-03-25
Supplement: 21598290cd191014-sup-228107_2_supp_6089003_q5ln6k.docx [file 21598290cd191014-sup-228107_2_supp_6089003_q5ln6k.docx]

**Supplementary Table 3.** Inclusion and exclusion criteria for cohort 2d (advanced HER2-expressing non-breast/non-gastric or HER2-mutant solid tumors)

| **Inclusion criteria** | **Exclusion criteria** |
| --- | --- |
| - Measurable disease based on RECIST version 1.1 - Able to provide fresh tumor biopsy samples - At least 1 of the following: - Non-breast/non-gastric, or GEJ adenocarcinoma pathologically documented HER2-expressing (determined by IHC, FISH, Next Generation Sequencing or other method) solid tumor that is refractory to standard treatment or for which no standard treatment is available - HER2 mutation in a pathologically documented advanced unresectable or metastatic solid tumor of any type that is refractory or for which no standard treatment is available | - Multiple primary malignancies within 3 years - Excludes contralateral breast cancer, adequately resected nonmelanoma skin cancer, and in situ disease that has been curatively treated |

FISH, fluorescence in situ hybridization; GEJ, gastroesophageal junction; HER2, human epidermal growth factor receptor 2; IHC, immunohistochemistry; RECIST, Response Evaluation Criteria in Solid Tumors.
